# Supplementary material for: Molecular-level understanding of reaction path optimization as a function of shape concerning the metal–support interaction effect of Co/CeO2 on water-gas shift catalysis
Source: Royal Society of Chemistry journal article supplement (doi:10.1039/c9cy01260e), 2019-01-01
Supplement: c9cy01260e1.pdf [file c9cy01260e1.pdf]

# **Molecular-level Understanding of Optimizing Reaction Paths for Shape Concerning the Metal-support Interaction Effect of Co/CeO<sub>2</sub> on Water-Gas Shift Catalysis**

Yingying Zhan, Yi Liu, Xuanbei Peng, Yongfan Zhang, Yanning Cao, Chak-tong Au  
and Lilong Jiang\*

*National Engineering Research Center of Chemical Fertilizer Catalyst, Fuzhou  
University, Fuzhou, Fujian 350002, China.* Corresponding author E-mail:  
jll@fzu.edu.cn/jllfzu@sina.cn

## **1. Results**

Co/CeO<sub>2</sub>-R (Figure 1B) show a diameter of 11.8±1nm (Figure 1C). HR-TEM image (Figure 1D) displays that Co/CeO<sub>2</sub>-R mainly has exposed (111) and (110) planes with *d*-spacing of 0.313 and 0.191 nm, respectively. The observation is consistent with the FFT result (Figure 1E). Co/CeO<sub>2</sub>-Sph is composed of uniform nanospheres 162 nm in size (Figure 1F–H). Notably, the spheres are made up of tiny close-packed nanoplates (Figure 1H), and the HR-TEM image of Figure 1I displays clear (111) and (110) lattice fringes with interplanar spacing of 0.313 and 0.191 nm, respectively. Co/CeO<sub>2</sub>-C (Figure 1K–L) is composed of nanocubes 17–48 nm in size (Figure 1M). The inter planar spacings (*d*-spacing) of 0.256 and 0.192 nm confirm the presence of (100) and (110) planes on the surfaces. The Co/CeO<sub>2</sub>-Spi sample shows spindles having length of 3–12 μm and width of 0.8–2.6 μm (Figure 1P). The sharp ends and curved edges of the spindles suggest the existence of defect sites (Figure 1S). The spindles have exposed (111) and (100) planes (Figure 1O). It is noted that the lattice fringes associated with Co<sub>3</sub>O<sub>4</sub> are not observed for all Co/CeO<sub>2</sub> samples, indicating good dispersion of Co<sub>3</sub>O<sub>4</sub> on CeO<sub>2</sub>,<sup>1</sup> as proven by STEM-mapping and line scanning.

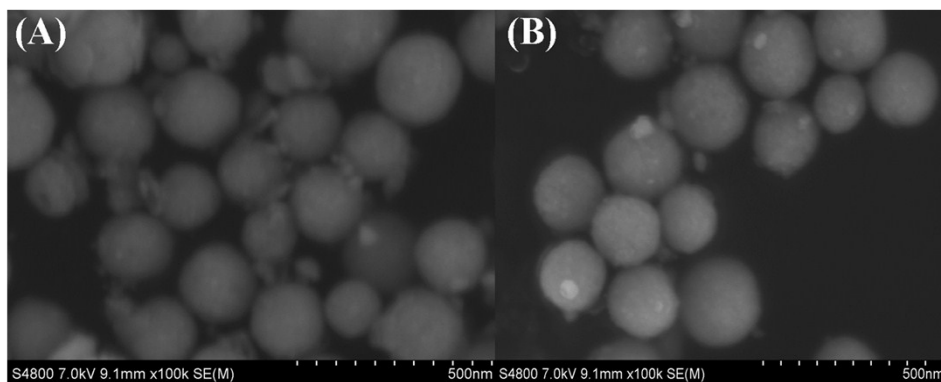

**Figure S1** (A) SEM image of Co/CeO<sub>2</sub>-Sph after WGS activity test. (B) SEM image of Co/CeO<sub>2</sub>-Sph after WGS activity test and then maintained at 400 °C for 30 h.

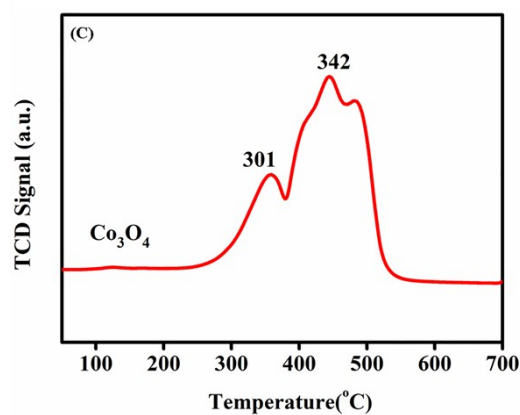

**Figure S2** H<sub>2</sub>-TPR profiles of (A) CeO<sub>2</sub> support; (B) Co/CeO<sub>2</sub> catalyst and (C) pure Co<sub>3</sub>O<sub>4</sub>.

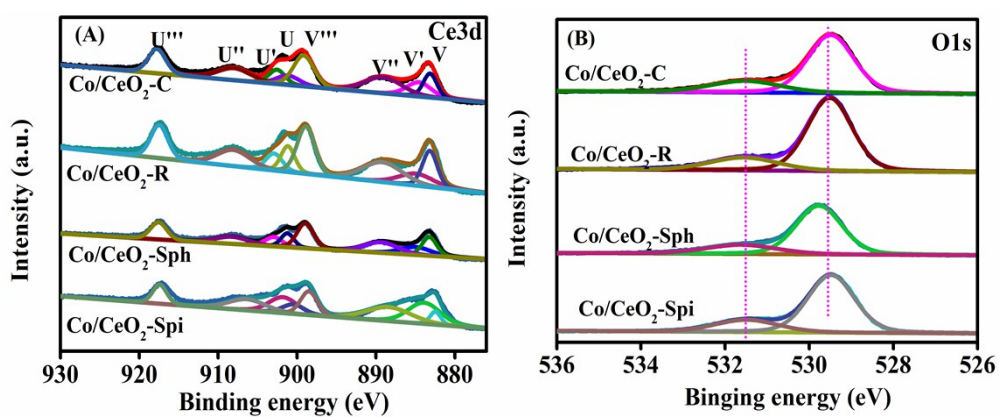

**Figure S3** XPS spectra of fresh Co/CeO<sub>2</sub> catalysts (A) Ce3d and (B) O1s.

For Ce3d XPS spectra (Figure S5A), the peaks assigned U' and V' are indicative of the  $3d^{10}4f^1$  initial electronic configuration matching well with surface  $Ce^{3+}$  species, while the peaks assigned U, U'', U''', V, V'' and V''' are the representative of the  $3d^{10}4f^0$  electronic configuration corresponding to surface  $Ce^{4+}$  species.<sup>1,2</sup> The ratio of  $Ce^{3+}/Ce$  is calculated and the results are given in Table S2. The surface  $Ce^{3+}$  concentrations in four Co-CeO<sub>2</sub> catalysts is about 25-27 % with only minor variations among the different morphologies. The existence of  $Ce^{3+}$  species could cause a charge imbalance and unsaturated chemical bonds on the catalyst surface, thereby giving rise to the promotion of surface oxygen vacancies. Concerning the type of oxygen species that could be involved in the redox or associative mechanisms,<sup>3,</sup> <sup>4</sup>O1s XPS spectra of catalysts are shown in Figure S5B. The peak at 529.4-529.7 eV can be assigned to lattice oxygen ( $O_{latt}$ ),<sup>5, 6</sup> while the one at 531.4-531.6 eV can be assigned to surface adsorbed oxygen species ( $O_{ads}$ ), resulting from the adsorption of gaseous O<sub>2</sub> into oxygen vacancies.<sup>8</sup> The  $O_{ads}/(O_{ads} + O_{latt})$  ratio in untreated Co<sub>3</sub>O<sub>4</sub>-CeO<sub>2</sub> catalysts is about 21-23% (Table S2) also with only minor variations among the different morphologies.

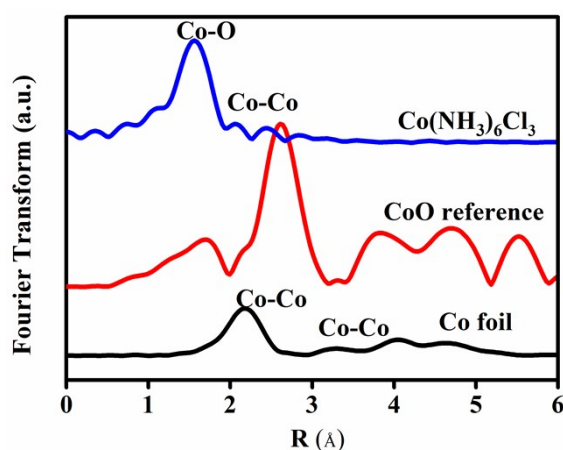

**Figure S4** EXAFS spectra of Co-K edge over reference samples.

**Table S1** Reaction temperature,  $Ce^{4+}/Ce$ ,  $Ce^{3+}/Ce$  and  $O_{ads}/(O_{latt}+O_{ads})$  ratio.

| Catalysts                | T <sub>90%</sub><br>(°C) | Ce <sup>4+</sup> /Ce<br>(%) | Ce <sup>3+</sup> /Ce<br>(%) | O <sub>ads</sub> /(O <sub>ads</sub> +O <sub>latt</sub> )<br>(%) |
|--------------------------|--------------------------|-----------------------------|-----------------------------|-----------------------------------------------------------------|
| Co/CeO <sub>2</sub> -C   | 372                      | 74.4                        | 25.6                        | 23                                                              |
| Co/CeO <sub>2</sub> -R   | 383                      | 72.7                        | 27.3                        | 21                                                              |
| Co/CeO <sub>2</sub> -Sph | 298                      | 73.2                        | 26.8                        | 25                                                              |
| Co/CeO <sub>2</sub> -Spi | -                        | 74.4                        | 25.6                        | 22                                                              |

**Table S2** Surface Co concentration and O<sub>ads</sub>/(O<sub>ads</sub>+O<sub>latt</sub>) ratio of Co/CeO<sub>2</sub>-Sph catalysts at different WGS reaction temperatures.

| Sample                            | Surface Co<br>concentration<br>(%) | O <sub>ads</sub> /(O <sub>ads</sub> +O <sub>latt</sub> )<br>(%) |
|-----------------------------------|------------------------------------|-----------------------------------------------------------------|
| Co/CeO <sub>2</sub> -Sph-Fresh    | 7.50                               | 25                                                              |
| Co/CeO <sub>2</sub> -Sph (200 °C) | 7.35                               | 41                                                              |
| Co/CeO <sub>2</sub> -Sph (300 °C) | 7.18                               | 50                                                              |
| Co/CeO <sub>2</sub> -Sph (400 °C) | 5.47                               | 58                                                              |

## References

1. B. C. Rivas, J. I. Gutiérrez-Ortiz, Morphology-dependent properties of Co<sub>3</sub>O<sub>4</sub>/CeO<sub>2</sub> catalysts for low temperature dibromomethane (CH<sub>2</sub>Br<sub>2</sub>) oxidation. *J. Catal.* 281 (2011) 88–97.
2. D. Carta, A. Corrias, A Structural and magnetic investigation of the inversion degree in ferrite nanocrystals MFe<sub>2</sub>O<sub>4</sub> (M = Mn, Co, Ni). *J. Phys. Chem. C* 113(2009) 8606–8615.
3. S. Zhang, F. (Feng). Tao, WGS catalysis and in situ studies of CoO<sub>1-x</sub>, PtCo<sub>n</sub>/Co<sub>3</sub>O<sub>4</sub>, and Pt<sub>m</sub>Co<sub>m</sub>/CoO<sub>1-x</sub> nanorod catalysts. *J. Am. Chem. Soc.* 135(2013) 8283–8293.
4. D. Gamarra, A. Martínez-Arias, Selective CO oxidation in excess H<sub>2</sub> over copper-ceria catalysts: identification of active entities/species. *J. Am. Chem. Soc.* 129 (2007) 12064–12065.
5. Y. Liu, G. Guo, Mesoporous Co<sub>3</sub>O<sub>4</sub>-supported gold nanocatalysts: highly active for the oxidation of carbon monoxide, benzene, toluene, and o-xylene. *J. Catal.* 309(2014) 408–

418 (2014).

6. J. Xu, S.C. Tsang, Size dependent oxygen buffering capacity of ceria nanocrystals. Chem. Commun. 46(2010) 1887–1889.
